# Supplementary material for: Development and comparison of a novel multiple cross displacement amplification (MCDA) assay with other nucleic acid amplification methods for SARS-CoV-2 detection
Source: bioRxiv or medRxiv preprint supplement (doi:10.1101/2020.10.03.20206193), 2020-12-01
Supplement: Supplementary file [file media-1.pdf]

## Development and comparison of a novel multiple cross displacement amplification (MCDA) assay with other nucleic acid amplification methods for SARS-CoV-2 detection

Laurence Don Wai Luu, Michael Payne, Xiaomei Zhang, Lijuan Luo and Ruiting Lan

**Supplementary Table 1:** List of MCDA, LAMP and rt-PCR primers used in this study. Bolded MCDA primer names are primers shared between 2 or more primer sets. \* indicate primers used in rt-PCR for confirmation of complete DNA removal from transcribed RNA. Red text indicates the final primer sets chosen for the MCDA SARS-CoV-2 assay.

| MCDA Primer name                    | Sequence 5' --> 3'                               | Reference  |
|-------------------------------------|--------------------------------------------------|------------|
| <b>Region 1 ORF1ab primer set 1</b> |                                                  |            |
| R1_1_F1*                            | CTCATGTGGGCGAAATACC                              |            |
| R1_1_2_F2                           | ATCGACATAGCGAGTGTATG                             |            |
| R1_1_2_C1                           | TTTAGATCGGCGCCGTAACATG                           |            |
| R1_1_2_C2                           | AAGAAAACCTGGAACACTAAACATAGC                      |            |
| R1_1_2_D1                           | CACCAGCTCCTTTATTACCG                             | This study |
| R1_1_D2                             | AGTGGTGTACCCGTGAAC                               |            |
| R1_1_4_R1*                          | TCGTCGCCTAAGTCAAATGAC                            |            |
| R1_1_2_R2                           | TTGGCACTGATCCTTATGAAG                            |            |
| R1_1_2_CP1                          | TTTAGATCGGCGCCGTAACATGCGCAAGTTCTTCTCGTAAGA       |            |
| R1_1_CP2                            | AAGAAAACCTGGAACACTAAACATAGCCTCCGTTAAGCTCACGCATG  |            |
| <b>Region 1 ORF1ab primer set 2</b> |                                                  |            |
| R1_2_F1                             | ATGTGGGCGAAATACCAAGT                             |            |
| R1_1_2_F2                           | ATCGACATAGCGAGTGTATG                             |            |
| R1_1_2_C1                           | TTTAGATCGGCGCCGTAACATG                           |            |
| R1_1_2_C2                           | AAGAAAACCTGGAACACTAAACATAGC                      |            |
| R1_1_2_D1                           | CACCAGCTCCTTTATTACCG                             | This study |
| R1_2_D2                             | GTGGTGTACCCGTGAAC                                |            |
| R1_2_R1                             | CGTCGCCTAAGTCAAATGAC                             |            |
| R1_1_2_R2                           | TTGGCACTGATCCTTATGAAG                            |            |
| R1_1_2_CP1                          | TTTAGATCGGCGCCGTAACATGCGCAAGTTCTTCTCGTAAGA       |            |
| R1_2_CP2                            | AAGAAAACCTGGAACACTAAACATAGCCTCCGTTAAGCTCACGC     |            |
| <b>Region 1 ORF1ab primer set 3</b> |                                                  |            |
| R1_3_F1                             | TTATGGTTGAGCTGGTAGC                              |            |
| R1_3_4_F2                           | TGTTATCGACATAGCGAGTGTATG                         |            |
| R1_3_C1                             | GCTCCTTTATTACCGTTCTTACGAAG                       |            |
| R1_3_C2                             | TGGCACTGATCCTTATGAAGATTTTC                       |            |
| R1_3_D1                             | ACTGGTATTCGCCACATGA                              | This study |
| R1_3_D2                             | CTGGAACACTAAACATAGCAGTG                          |            |
| R1_3_R1                             | ATCGGCGCCGTAACATGGCCA                            |            |
| R1_3_R2                             | TCATTTGACTAGCGCACGA                              |            |
| R1_3_CP1                            | GCTCCTTTATTACCGTTCTTACGAAGAGAAGTGAAGGCATTAGTA    |            |
| R1_3_CP2                            | TGGCACTGATCCTTATGAAGATTTTCCTCCGTTAAGCTCACGCATGA  |            |
| <b>Region 1 ORF1ab primer set 4</b> |                                                  |            |
| R1_4_F1                             | AGAACTCGAAGGCATTAGTA                             |            |
| R1_3_4_F2                           | TGTTATCGACATAGCGAGTGTATG                         |            |
| R1_4_C1                             | TTAGATCGGCGCCGTAACATG                            |            |
| R1_4_C2                             | CAAGAAAACCTGGAACACTAAACATAGC                     |            |
| R1_4_D1                             | CTTACGAAGAAGAACCTTGC                             | This study |
| R1_4_D2                             | CAGTGGTGTACCCGTGAAC                              |            |
| R1_1_4_R1                           | TCGTCGCCTAAGTCAAATGAC                            |            |
| R1_4_R2                             | TTGGCACTGATCCTTATGAAGAT                          |            |
| R1_4_CP1                            | TTAGATCGGCGCCGTAACATGCGCTATGTGGCGAAATACCAAGT     |            |
| R1_4_CP2                            | CAAGAAAACCTGGAACACTAAACATAGCCTCCGTTAAGCTCACGCATG |            |
| <b>Region 2 ORF1ab primer set 1</b> |                                                  |            |
| R2_1_2_F1*                          | CCACAGTACGTCTACAAGC                              |            |
| R2_1_2_F2                           | TATGTGGCAACGGCAGTAC                              |            |
| R2_1_C1                             | GTAAGCTTTAGCAGCATCTACAGC                         |            |
| R2_1_3_4_C2                         | TGGTCAGGCAATAACAGTTACACC                         |            |
| R2_1_2_D1                           | GCACAGAAAGATAATACAGTTG                           | This study |
| R2_1_2_D2                           | AAGCCAATATGGATCAAGAATC                           |            |
| R2_1_R1*                            | AGTGATTGGTTGCCCCAC                               |            |
| R2_1_R2                             | AGATGTTGTGTACACACTG                              |            |
| R2_1_CP1                            | GTAAGCTTTAGCAGCATCTACAGCTAATGCAACAGAAAGTGCCTGC   |            |
| R2_1_CP2                            | TGGTCAGGCAATAACAGTTACACCAGACAACACGATGACCACC      |            |
| <b>Region 2 ORF1ab primer set 2</b> |                                                  |            |
| R2_1_2_F1                           | CCACAGTACGTCTACAAGC                              |            |
| R2_1_2_F2                           | TATGTGGCAACGGCAGTAC                              |            |
| R2_2_C1                             | CCTTGTAAAGCTTTAGCAGCATCTAC                       |            |

|                                     |                                                     |            |
|-------------------------------------|-----------------------------------------------------|------------|
| R2_2_C2                             | GGTCAGGCAATAACAGTTACACCG                            |            |
| <b>R2_1_2_D1</b>                    | GCACAGAAAGATAATACAGTTG                              | This study |
| <b>R2_1_2_D2</b>                    | AAGCCAATATGGATCAAGAATC                              |            |
| R2_2_R1                             | CAATTAGTGATTGGTTGTCC                                |            |
| R2_2_R2                             | GATGTTGTGTACACACTGG                                 |            |
| R2_2_CP1                            | CTTTGTAAGCTTTAGCAGCATCTACGTAATGCAACAGAAGTGCCTG      |            |
| R2_2_CP2                            | GGTCAGGCAATAACAGTTACACCGAGACAACACGATGCCACC          |            |
| <b>Region 2 ORF1ab primer set 3</b> |                                                     |            |
| R2_3_F1                             | AGTTTAGCTGCCACAGTACGTC                              |            |
| <b>R2_3_4_F2</b>                    | CTATGTGGCAACGGCAGTACA                               |            |
| R2_3_C1                             | GTAAGCTTTAGCAGCATCTACAGCAA                          |            |
| <b>R2_1_3_4_C2</b>                  | TGGTCAGGCAATAACAGTTACACC                            |            |
| R2_3_D1                             | GCACAGAAAGATAATACAGTTGAAT                           | This study |
| <b>R2_3_4_D2</b>                    | GGAAGCCAATATGGATCAAGAA                              |            |
| <b>R2_3_4_R1</b>                    | ACACAATTAGTGATTGGTTGTCC                             |            |
| R2_3_R2                             | AGATGTTGTGTACACACTGGT                               |            |
| R2_3_CP1                            | GTAAGCTTTAGCAGCATCTACAGCAAGGTAATGCAACAGAAGTGCCTG    |            |
| <b>R2_3_4_CP2</b>                   | TGGTCAGGCAATAACAGTTACACCGACAACACGATGCCACCACAA       |            |
| <b>Region 2 ORF1ab primer set 4</b> |                                                     |            |
| R2_4_F1                             | CCTAAATAGAGGTATGGTACTT                              |            |
| <b>R2_3_4_F2</b>                    | CTATGTGGCAACGGCAGTACA                               |            |
| R2_4_C1                             | TGTAAGCTTTAGCAGCATCTACAGCAA                         |            |
| <b>R2_1_3_4_C2</b>                  | TGGTCAGGCAATAACAGTTACACC                            |            |
| R2_4_D1                             | GCAGGCACTTCTGTTGCATTACC                             | This study |
| <b>R2_3_4_D2</b>                    | GGAAGCCAATATGGATCAAGAA                              |            |
| <b>R2_3_4_R1</b>                    | ACACAATTAGTGATTGGTTGTCC                             |            |
| R2_4_R2                             | TAAGATGTTGTGTACACACTG                               |            |
| R2_4_CP1                            | TGTAAGCTTTAGCAGCATCTACAGCAAGTAAAGTGCACAGTACGCT      |            |
| <b>R2_3_4_CP2</b>                   | TGGTCAGGCAATAACAGTTACACCGACAACACGATGCCACCACAA       |            |
| <b>Region 3 N gene primer set 1</b> |                                                     |            |
| R3_1_F1*                            | AGAATGGAGAACGCGAGTGG                                |            |
| R3_1_F2                             | AAATACCATCTTGGACTGAG                                |            |
| R3_1_C1                             | TGCCATGTTGAGTGAGAGCGGTG                             |            |
| R3_1_C2                             | TAGCAGTCCAGATGACCAAATTGG                            |            |
| R3_1_D1                             | AACCAAGACGCGATATTATTG                               | This study |
| R3_1_D2                             | CTACCGAAGAGCTACCGAC                                 |            |
| R3_1_R1*                            | CCTCGAGGGAATTTAAGGTC                                |            |
| R3_1_R2                             | AAGGCGTTCCAATTAACACC                                |            |
| R3_1_CP1                            | TGCCATGTTGAGTGAGAGCGGTGAAACAACGTGCGCCCAAGG          |            |
| R3_1_CP2                            | TAGCAGTCCAGATGACCAAATTGGTACCGTACCACCACGAATTC        |            |
| <b>Region 3 N gene primer set 2</b> |                                                     |            |
| R3_2_F1                             | AAACAACGTCGCCCCAAG                                  |            |
| R3_2_F2                             | TGCCCCAGTCTCAGGTAG                                  |            |
| R3_2_C1                             | TTGTCCTCGAGGGAATTTAAGGTC                            |            |
| <b>R3_2_3_C2</b>                    | ACCGAAGAGCTACCAGACGAATTC                            |            |
| R3_2_D1                             | TTGCCATGTTGAGTGAGAGC                                | This study |
| R3_2_D2                             | GTGGTGGTGACGGTAAAATG                                |            |
| R3_2_R1                             | CTATTGGTGTTAATTGGAACG                               |            |
| R3_2_R2                             | CAGATGACCAAATTGGCTAC                                |            |
| R3_2_CP1                            | TTGTCCTCGAGGGAATTTAAGGTCAATACTGCGTCTTGTTCCACC       |            |
| R3_2_CP2                            | ACCGAAGAGCTACCAGACGAATTCAGAAATACCATCTTGGACTGAG      |            |
| <b>Region 3 N gene primer set 3</b> |                                                     |            |
| R3_3_F1                             | CGATCAAACAACGTGCGCC                                 |            |
| R3_3_F2                             | TCTGGCCAGTCTCAGGTA                                  |            |
| R3_3_C1                             | TTGTCCTCGAGGGAATTTAAGGTCTT                          |            |
| <b>R3_2_3_C2</b>                    | ACCGAAGAGCTACCAGACGAATTC                            |            |
| R3_3_D1                             | CTTGCCATGTTGAGTGAGAGC                               | This study |
| R3_3_D2                             | GTGGTGGTGACGGTAAAATGAA                              |            |
| R3_3_R1                             | CTATTGGTGTTAATTGGAACGCC                             |            |
| R3_3_R2                             | TCCAGATGACCAAATTGGCTAC                              |            |
| R3_3_CP1                            | TTGTCCTCGAGGGAATTTAAGGTCTTCAATAATACTGCGTCTTGTTCCACC |            |
| R3_3_CP2                            | ACCGAAGAGCTACCAGACGAATTTAGAAATACCATCTTGGACTGAGA     |            |
| <b>Region 3 N gene primer set 4</b> |                                                     |            |
| R3_4_F1                             | GCAGTAACCAGAATGGAGAAC                               |            |
| R3_4_F2                             | TTCTGGCCAGTCTCAGGTA                                 |            |
| R3_4_C1                             | CTTGCCATGTTGAGTGAGAGCGGT                            |            |
| R3_4_C2                             | CAAATTTGGTACTACCAGAGCTAC                            |            |
| R3_4_D1                             | GAACCAAGACGCGATATTATTG                              | This study |
| R3_4_D2                             | AATTCGTGGTGGTGACGGTAA                               |            |
| R3_4_R1                             | TCCTCGAGGGAATTTAAGGTCT                              |            |
| R3_4_R2                             | AAGGCGTTCCAATTAACACCAATA                            |            |

R3\_4\_CP1  
R3\_4\_CP2

CTTGCCATGTTGAGTGAGAGCGGTCAAACAACGTCGGCCCAAG  
CAAATTGGCTACTACCGAAGAGCTACTAGAAATACCATCTTGGACTGAGAT

| LAMP primer name                  | Sequence 5' --> 3'                         |                                                                                |
|-----------------------------------|--------------------------------------------|--------------------------------------------------------------------------------|
| <b>Region 1 ORF1ab primer set</b> |                                            |                                                                                |
| ORF1a-A-F3                        | CTGCACCTCATGGTCATGTT                       |                                                                                |
| ORF1a-A-B3                        | AGCTCGTCGCCTAAGTCAA                        |                                                                                |
| ORF1a-A-FIP                       | GAGGGACAAGGACACCAAGTGTATGGTTGAGCTGGTAGCAGA | Zhang et al. 2020 Rapid Molecular Detection of SARS-CoV-2 (COVID-19) Virus RNA |
| ORF1a-A-BIP                       | CCAGTGGCTTACCGCAAGGTTTTAGATCGGCCCGTAAC     | Using Colorimetric LAMP                                                        |
| ORF1a-A-LF                        | CCGTACTGAATGCCTTCGAGT                      |                                                                                |
| ORF1a-A-LB                        | TTCGTAAGAACGGTAATAAAGGAGC                  |                                                                                |
| <b>Region 3 N gene primer set</b> |                                            |                                                                                |
| GeneN-A-F3                        | TGGCTACTACCGAAGAGCT                        |                                                                                |
| GeneN-A-B3                        | TGCAGCATTGTTAGCAGGAT                       |                                                                                |
| GeneN-A-FIP                       | TCTGGCCAGTTCCTAGGTAGTCCAGACGAATTCGTGGTGG   | Zhang et al. 2020 Rapid Molecular Detection of SARS-CoV-2 (COVID-19) Virus RNA |
| GeneN-A-BIP                       | AGACGGCATCATATGGGTTGCACGGGTGCCAATGTGATCT   | Using Colorimetric LAMP                                                        |
| GeneN-A-LF                        | GGACTGAGATCTTTCATTTTACCGT                  |                                                                                |
| GeneN-A-LB                        | ACTGAGGGAGCCTTGAATACA                      |                                                                                |
| <b>rt-PCR primer name</b>         |                                            |                                                                                |
| <b>Region 3 N gene primer set</b> |                                            |                                                                                |
| WH-NIC N-F                        | CGTTTGGTGGACCCTCAGAT                       | WHO Molecular assays to diagnose COVID-19:                                     |
| WH-NIC N-R                        | CCCCACTGCGTTCTCCATT                        | Summary table of available protocols- National                                 |
| WH-NIC N-P                        | FAM-CAACTGGCAGTAACCA- BHQ1                 | Institute of Health, Thailand                                                  |

**Supplementary Table 2:** List of synthesised gene fragments used as DNA/RNA template for MCDA, LAMP and rt-PCR. Blue indicates universal M13 adapters while red depicts the sequence for T7 promoter.

| Gene fragment name | Position in NC_045512.2 | Gene target | Sequence 5' -> 3'                                                                                                                                                                                                                                                                                                                                                                                                                                                                                                                                                                                                                       |
|--------------------|-------------------------|-------------|-----------------------------------------------------------------------------------------------------------------------------------------------------------------------------------------------------------------------------------------------------------------------------------------------------------------------------------------------------------------------------------------------------------------------------------------------------------------------------------------------------------------------------------------------------------------------------------------------------------------------------------------|
| Region 1           | 416-931                 | ORF1ab      | <p>TGTA<sup>BLUE</sup>AAACGACGGCCAGT<sup>RED</sup>TAATACGACTCACTATAGTGTGGCTTAGTAGAAGTTGAAAAAGCGTTTTGCCTCAACTTGAACAGCCCTATGTGTTTCATCAAACGTTTCGGATGCTCGAACTGCACCTCATGGTCATGTTATGGTTGAGCTGGTAGCAGAACTCGAAGGCATTCAGTACGGTCGTAGTGGTGAGACACTTGGTGTCTTGTCCCTCATGTGGCGAAATACAGTGGCTTACCGCAAGTTCTTCTTGTAAAGACGGTAATAAAGGAGCGTGGTGCCATAGTTACGGCCGATCTAAAGTCAATTGACTTAGCCGACGAGCTTGGCACTGATCTTATGAAGATTTCAAGAAAACTGGAACACTAAACATAGCAGTGGTGTACCCGTGAACTCATGCGTGAAGCTTAAACGAGGGGCATACACTCGATATGTCGATAACAACCTCTGTGGCCCTGATGGTACCCTCTTGAGTCATTAAGACCTTAGCACGTGCTGGTAAAGCTTCATGCACCTTTGTCGAAACCACTGGACTTTATT<sup>BLUE</sup>GGTCTATAGCTGTTTCCTG</p>      |
| Region 2           | 12869-13388             | ORF1ab      | <p>TGTA<sup>BLUE</sup>AAACGACGGCCAGT<sup>RED</sup>TAATACGACTCACTATAGACTGGTACTATCTATACAGAAGTGGAAACCACTTGTAGGTTTGTACAGACACACTAAAGTCCCTAAAGTGAAGTATTTATACTTTATTAAGGATTAACAACCTAAATAGAGGTATGGTACTTGGTAGTTTAGCTGCCACAGTACGTCTACAAGCTGGTAATGCAACAGAAGTGCCTGCCAATCACTGTATTATCTTTCTGTGCTTTTGTCTGATAGTGTGCTAAAGCTTACAAGATTTACTAGCTAGTGGGGACAACCAATCACTAATTGTGTTAAGATGTTGTGTACACACACTGGTACTGGTCAGGCAATAACAGTTACACCGGAAAGCCAAATATGGATCAAGAATCCTTTGGTGGTGCATCGTGTGCTGTACTGCGGTTGCCACATAGATCATCAAATCCTAAAGGATTTTGTGACTTAAAGGTAAGTATGTACAAATACCTACAACTGTGCTAATGACCCTGTGGGTTTTACACTAAAAACACAGTCTGTACCGTCTCGGGTAG<sup>BLUE</sup>GGTCTATAGCTGTTTCCTG</p> |
| Region 3           | 28246-28747             | N           | <p>TGTA<sup>BLUE</sup>AAACGACGGCCAGT<sup>RED</sup>TAATACGACTCACTATAGTAGATTTCATCTAAACGAACAACTAAAATGTTGATAATGGACCCAAAATCAGCGAAATGCACCCCGATTACGTTTGGTGGACCTCAGATTCAACTGGCAGTAACCAAGATGGAGAACGCACTGGGGCGGATCAAACAACGTCGGCCCCAAGTTTACCATAAATACTGCGTCTTGGTTCACCGCTCTCACTCAACATGGCAAGGAAACCTTAAATCCCTCGAGGACAAGCGTTTCCAAATTAACCAATAGCAGTCCAGATGACCAAATGGCTACTACCGAAGAGCTACACAGACGAATTCGTGGTGGTGCAGGTAATAAGAAAGATCTCAGTCCAAGATGGTATTTCTACTACCTAGGAACTGGGCCAGAAGCTGGACTTCCCTATGGTGCATAACAAAGACGGCATCATATGGTTGCAACTGAGGGAGCCTTGAATACACCAAAAGATCACATTGGCACCCGCAATCTGTAAACAATGCTGCAATCGTGG<sup>BLUE</sup>CTATAGCTGTTTCCTG</p>                       |

BLUE = universal M13  
RED = T7 promoter
